# Supplementary material
Source: publisher site journal article supplement (https://www.spandidos-publications.com/4888/downloadSupplementary)

Figure S1. Genetic testing result of the patient's father. He has the mutation in exon8 (c.1376G>A) but does not have the mutation in exon1 (c.182T>C).

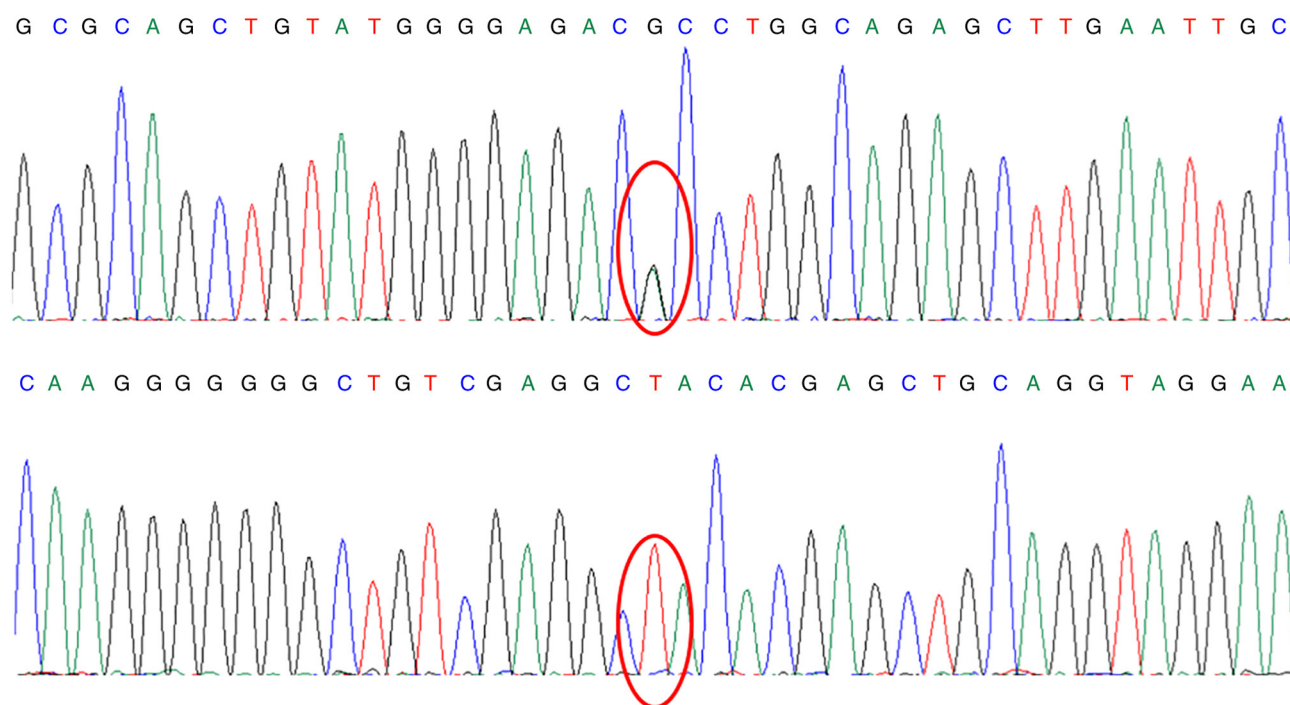

Figure S2. Genetic testing result of the patient's mother. She has the mutation in exon1 (c.182T>C) but does not have the mutation in exon8 (c.1376G>A).

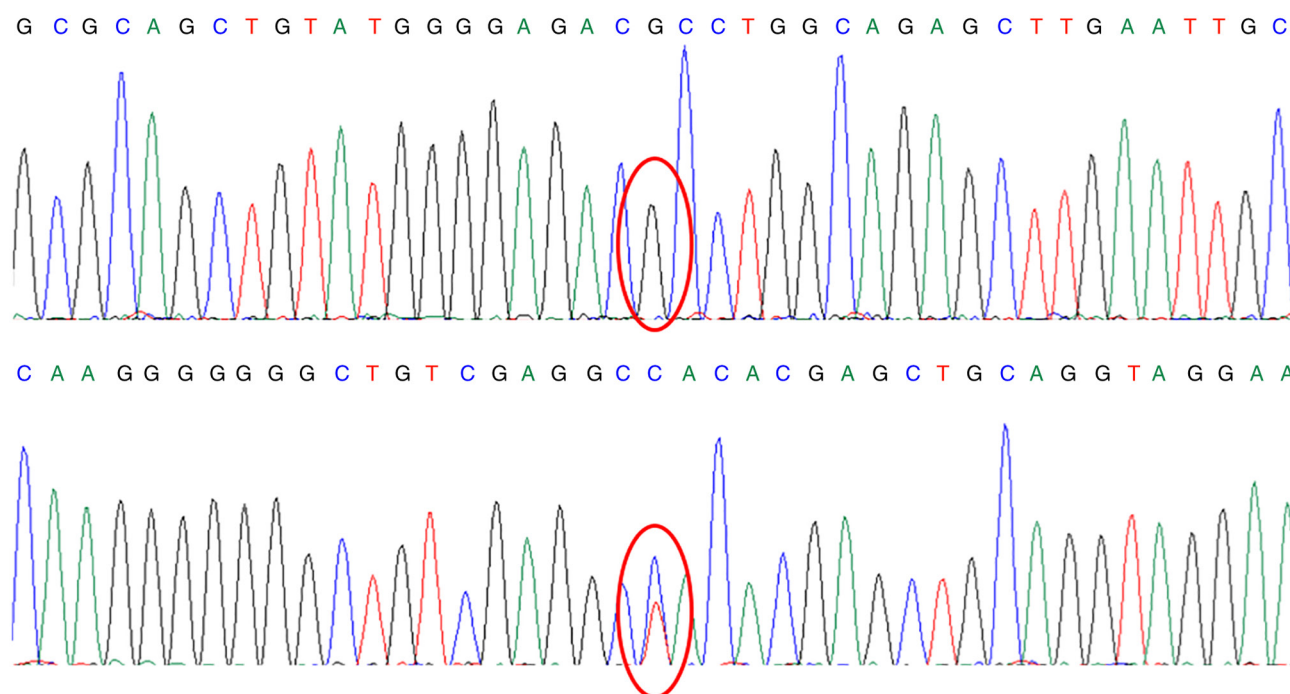

Supplement: Supplementary file 1 [file downloadSupplementary]
